# Supplementary material for: Machine learning-assisted immune profiling stratifies peri-implantitis patients with unique microbial colonization and clinical outcomes
Source: PubMed Central journal article supplement (PMC8171076; doi:10.7150/thno.57775), 2021-05-03
Supplement: thnov11p6703s1.pdf [file thnov11p6703s1.pdf]

## Supplementary Materials

### **Supplementary Fig. S1. PICF cytokine and chemokine levels do not predict peri-implantitis**

**outcomes.** Baseline cytokine and chemokine levels in the PICF were quantitated using a Luminex multiplex assay. Assay technical controls are valid. (A) IL-1 $\beta$ , (B) MMP-9, and (C) IL-10 were present (\* $p < 0.05$ ,  $n = 3-15$ ), yet most are not associated with initial disease severity or treatment outcomes.

### **Supplementary Fig. S2. PICF cytokine profiles are characterized in patients with different peri-**

**implant immune infiltrates.** (A) IL-1 $\beta$ , (B) MMP-9, and (C) IL-10 protein levels in the PICF were measured using a Luminex assay. Differences were compared in patients in different immune-risk groups using one-way ANOVA followed by multi-comparison tests (\* $p < 0.05$ ,  $n = 3-15$ ).

### **Supplementary Fig. S3. Gene set association analysis identifies new pathways that are related to**

**patient outcomes.** (A) Utilizing probing depth reduction (left panel) or bleeding on probing (right panel) as clinical endpoints, we performed a Gene Set Enrichment Analysis to identify the most important signaling pathways driving clinical outcomes. The numbers of overlapping genes between different pathways are shown. (B to C) The median expression levels of signature genes in the complement and inflammatory pathways were used to classify patients and probing depth reductions are shown (\*\* $p < 0.01$ , \* $p < 0.05$ ,  $n = 3-15$ ).

**Supplementary Table S1 Demographic information of enrolled patients** A total of 15 male and 9 female patients were enrolled and their distribution across the risk span is shown. We measured their bone levels, deepest probing depth (PD), PDs, recession (REC), gingival index (GI), bleeding on probing (BOP), plaque index (PI).

**Supplementary Table S2 Gene expression profiles in patients with low-risk peri-implantitis**

Differentially expressed genes among risk groups were first detected using the non-parametric Kruskal Wallis test; and the corresponding p-values are reported in the column 'All (p-val)'. A post-hoc analysis using Dunn test was then performed to determine the significance (p-val) and select genes with a monotonic trend among risk groups. The statistics between different groups are the average rank differences. (A) A list of genes whose expression values are the highest in the immune low-risk group is shown. (B) A list of genes whose expression values are the lowest in the immune low-risk group is shown.

# Supplementary Figure S1

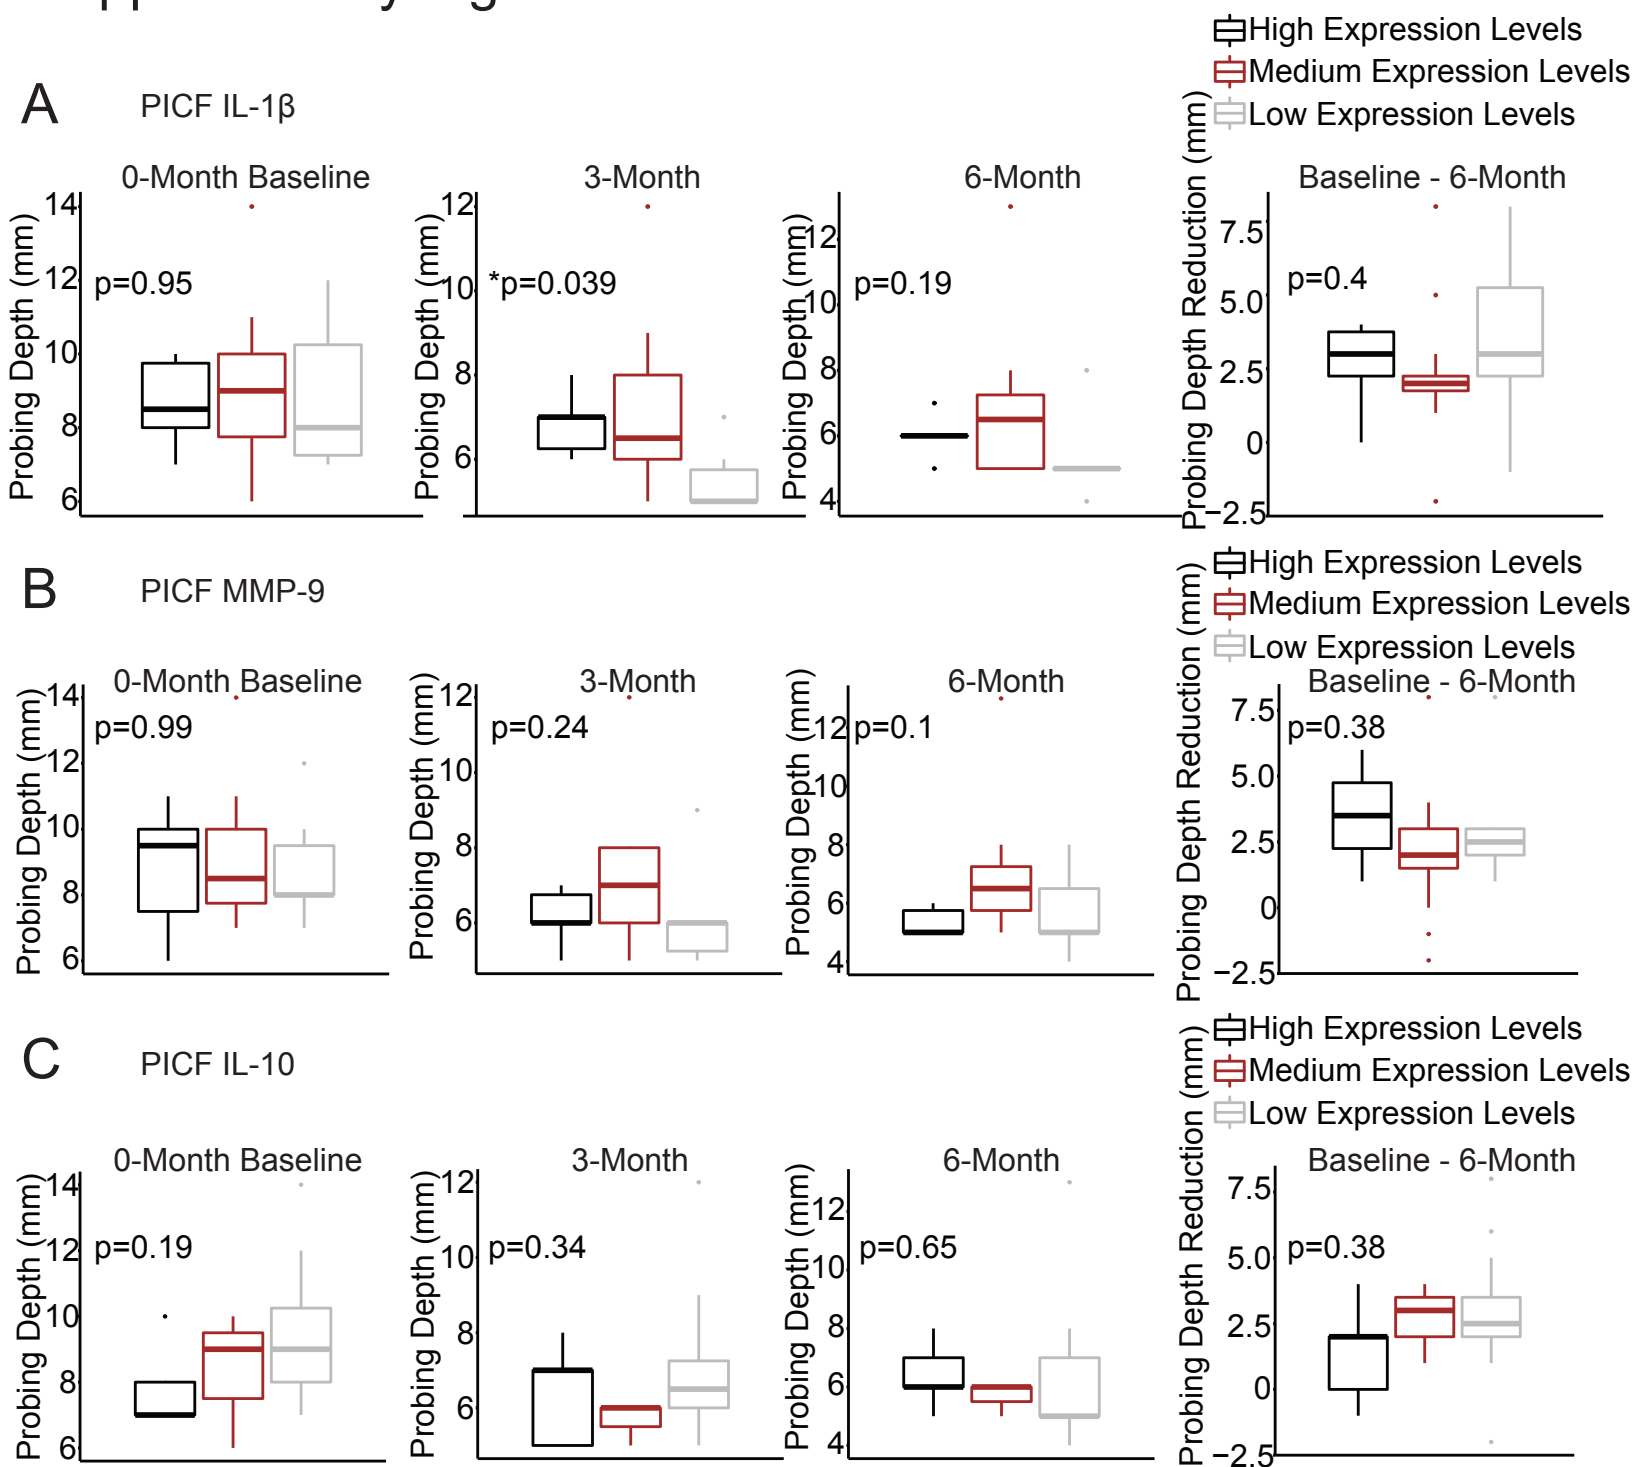

# Supplementary Figure S2

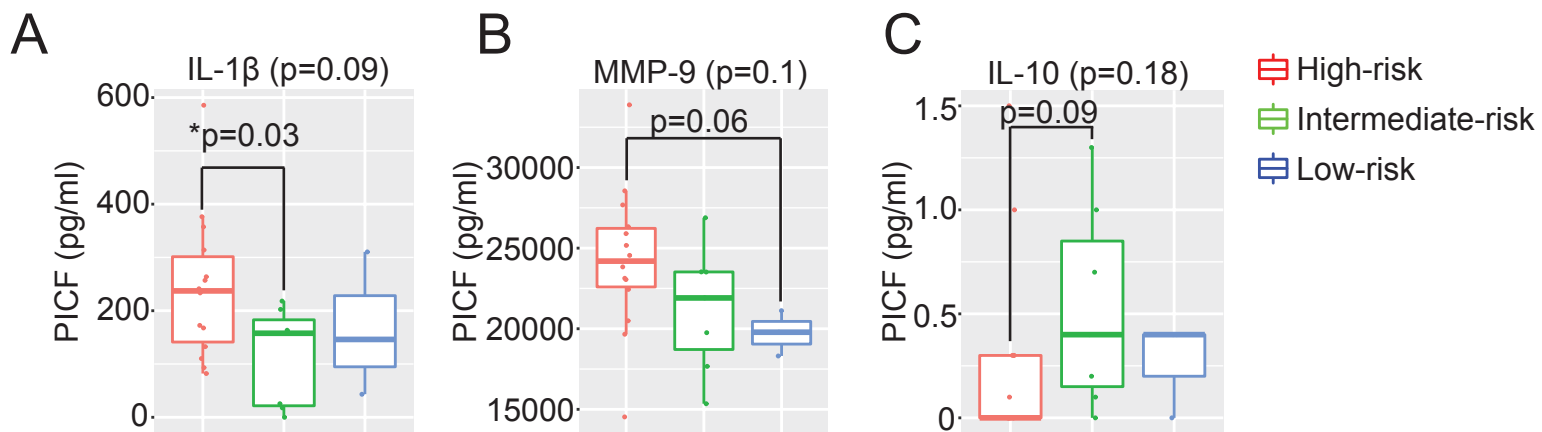

# Supplementary Figure S3

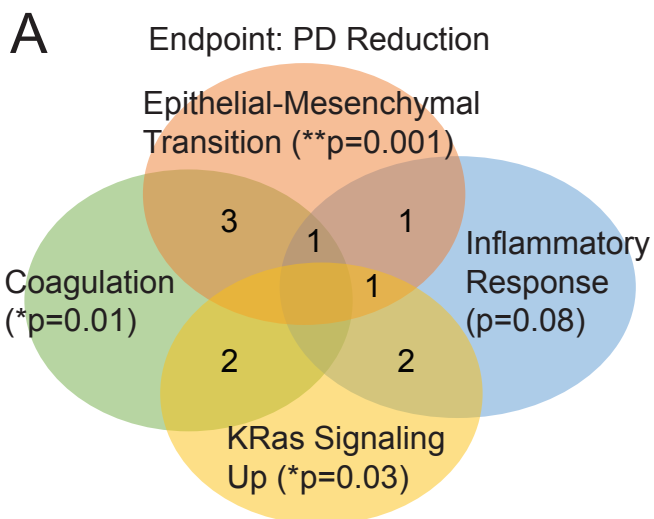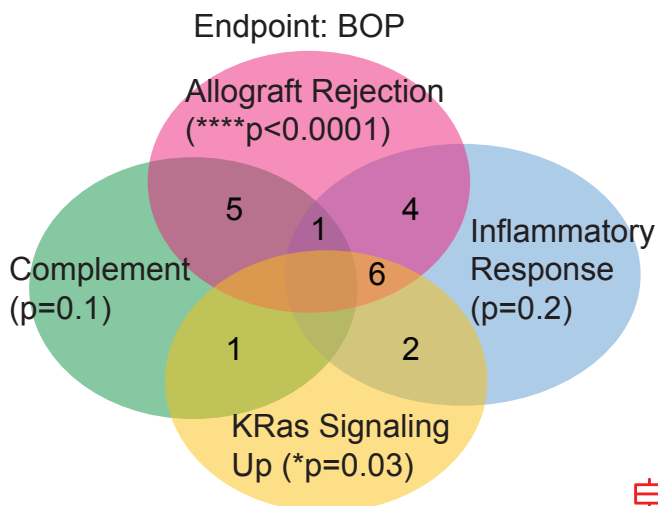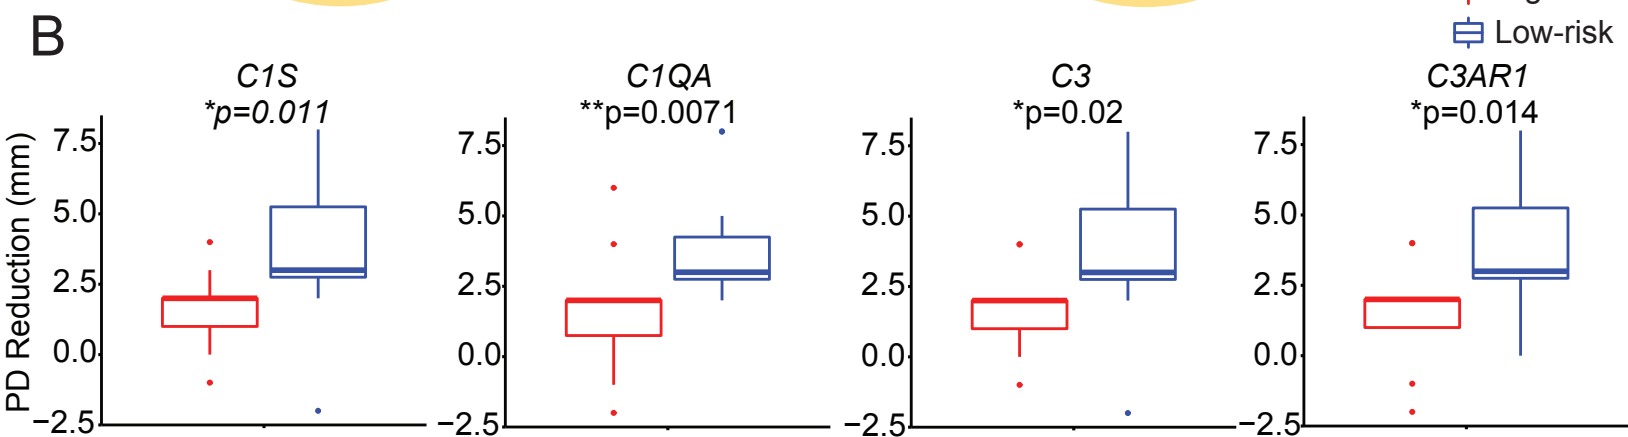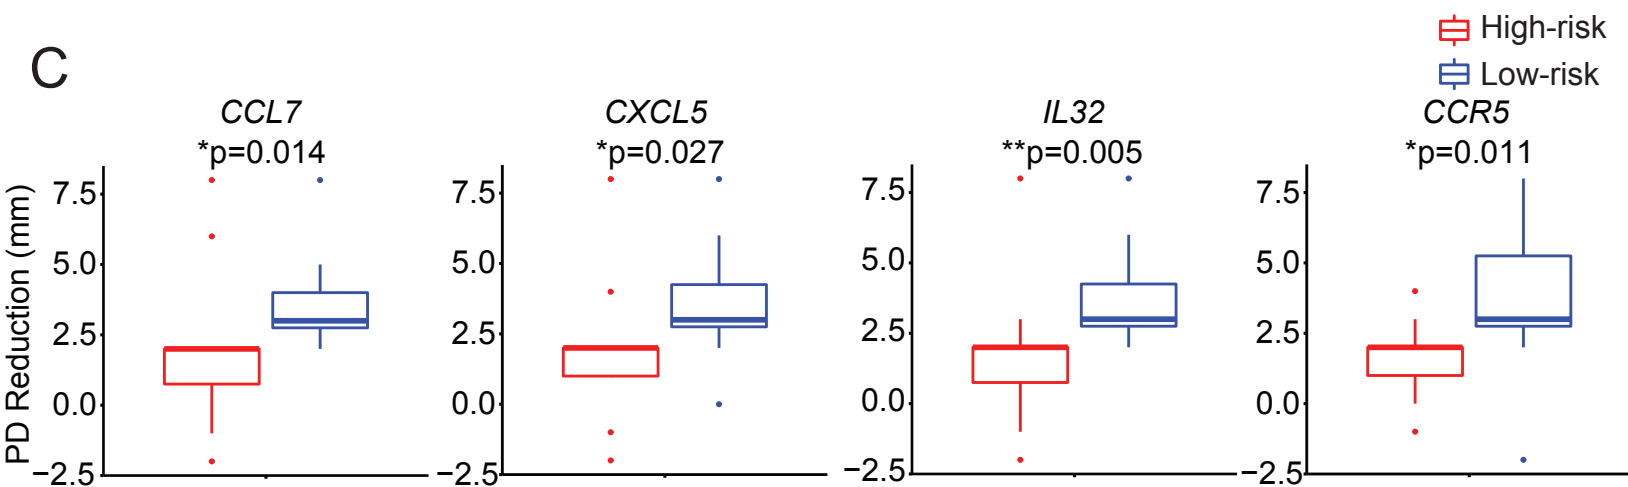

Table S1

| Risk group<br>Male: Female | High<br>10: 4 |      | Intermediate<br>4:3 |       | Low<br>1:2 |      |
|----------------------------|---------------|------|---------------------|-------|------------|------|
|                            | Mean          | SD   | Mean                | SD    | Mean       | SD   |
| Age                        | 67.00         | 8.94 | 58.86               | 15.63 | 69.33      | 3.06 |
| Bone level baseline (mm)   | 7.64          | 2.59 | 6.97                | 1.37  | 7.59       | 2.16 |
| Bone level 6 months        | 6.55          | 2.95 | 5.72                | 1.56  | 6.18       | 1.88 |
| Bone gain                  | 1.10          | 1.06 | 1.25                | 1.41  | 1.41       | 1.76 |
| Deepest PD baseline (mm)   | 8.64          | 2.21 | 8.71                | 1.38  | 10.33      | 1.53 |
| Deepest PD 3 months        | 7.00          | 1.92 | 6.43                | 0.79  | 5.67       | 0.58 |
| Deepest PD 6 months        | 6.86          | 2.11 | 5.43                | 0.79  | 5.00       | 1.00 |
| Reduction of deepest PD    | 1.79          | 2.46 | 3.29                | 1.38  | 5.33       | 2.52 |
| PD baseline (mm)           | 7.24          | 2.01 | 7.02                | 1.27  | 6.56       | 0.92 |
| PD 3 months                | 5.79          | 1.68 | 5.33                | 0.62  | 4.72       | 0.79 |
| PD 6 months                | 5.14          | 1.63 | 4.62                | 0.50  | 3.94       | 0.84 |
| Reduction of PD            | 2.10          | 1.85 | 2.40                | 1.35  | 2.56       | 0.69 |
| REC baseline (mm)          | 0.10          | 0.84 | -0.12               | 0.61  | 0.61       | 1.60 |
| REC 3 months               | 0.48          | 1.12 | 0.07                | 0.89  | 0.83       | 1.86 |
| REC 6 months               | 0.54          | 1.14 | 0.48                | 1.17  | 0.67       | 1.92 |
| REC changes                | 0.39          | 0.79 | 0.60                | 1.50  | 0.06       | 0.51 |
| GI baseline                | 1.58          | 0.75 | 1.90                | 0.65  | 1.61       | 0.95 |
| GI 3 months                | 0.83          | 0.55 | 0.57                | 0.43  | 0.39       | 0.10 |
| GI 6 months                | 0.76          | 0.61 | 0.36                | 0.47  | 0.33       | 0.58 |
| BOP baseline               | 0.80          | 0.28 | 0.95                | 0.13  | 0.83       | 0.29 |
| BOP 3 months               | 0.64          | 0.33 | 0.40                | 0.27  | 0.28       | 0.10 |
| BOP 6 months               | 0.60          | 0.32 | 0.36                | 0.37  | 0.39       | 0.54 |
| PI baseline                | 0.44          | 0.47 | 0.36                | 0.46  | 0.17       | 0.29 |
| PI 3 months                | 0.64          | 0.49 | 0.19                | 0.24  | 0.50       | 0.60 |
| PI 6 months                | 0.40          | 0.34 | 0.26                | 0.21  | 0.44       | 0.42 |

**Table S2A** List of genes whose expression levels are increased in low-risk group

|             | all (p-val) | G1 vs G2 (stat) | G1 vs G3 (stat) | G2 vs G3 (stat) | G1 vs G2 (p-val) | G1 vs G3 (p-val) | G2 vs G3 (p-val) |
|-------------|-------------|-----------------|-----------------|-----------------|------------------|------------------|------------------|
| ABCC4       | 0.0178      | -2.3349         | -2.1329         | -0.4001         | 0.0098           | 0.0165           | 0.3445           |
| AC011043.1  | 0.0139      | -1.7894         | -2.6780         | -1.2687         | 0.0368           | 0.0037           | 0.1023           |
| AC011515.2  | 0.0028      | -2.2863         | -3.0334         | -1.2630         | 0.0111           | 0.0012           | 0.1033           |
| AC026150.6  | 0.0320      | -0.4629         | -2.6178         | -2.1029         | 0.3217           | 0.0044           | 0.0177           |
| AC090505.5  | 0.0384      | -0.5847         | -2.5528         | -1.9613         | 0.2794           | 0.0053           | 0.0249           |
| AC108463.2  | 0.0211      | -0.3929         | -2.7633         | -2.2841         | 0.3472           | 0.0029           | 0.0112           |
| ACHE        | 0.0438      | -0.2619         | -2.4769         | -2.1079         | 0.3967           | 0.0066           | 0.0175           |
| ACP5        | 0.0093      | -2.5968         | -2.1964         | -0.2830         | 0.0047           | 0.0140           | 0.3886           |
| ACTL7B      | 0.0028      | -1.0141         | -3.4243         | -2.4768         | 0.1553           | 0.0003           | 0.0066           |
| ADAM12      | 0.0287      | -0.1091         | -2.6092         | -2.3324         | 0.4566           | 0.0045           | 0.0098           |
| ADAM19      | 0.0416      | -1.0038         | -2.4875         | -1.6200         | 0.1577           | 0.0064           | 0.0526           |
| ADAMTS14    | 0.0494      | -0.5019         | -2.4505         | -1.9225         | 0.3079           | 0.0071           | 0.0273           |
| ADGRE2      | 0.0452      | -1.1129         | -2.4293         | -1.4931         | 0.1329           | 0.0076           | 0.0677           |
| AKR1B1      | 0.0193      | -2.5095         | -1.8365         | -0.0098         | 0.0060           | 0.0331           | 0.4961           |
| ALB         | 0.0085      | -1.3522         | -3.0226         | -1.8796         | 0.0882           | 0.0013           | 0.0301           |
| AMPH        | 0.0342      | -0.3491         | -2.5828         | -2.1470         | 0.3635           | 0.0049           | 0.0159           |
| ANGPTL2     | 0.0216      | -0.3273         | -2.7468         | -2.3129         | 0.3717           | 0.0030           | 0.0104           |
| ANPEP       | 0.0132      | -1.0474         | -2.9215         | -1.9908         | 0.1474           | 0.0017           | 0.0232           |
| ANTXR1      | 0.0226      | -1.1784         | -2.6992         | -1.6981         | 0.1193           | 0.0035           | 0.0447           |
| ANXA2P1     | 0.0341      | -0.4872         | -2.5957         | -2.0663         | 0.3130           | 0.0047           | 0.0194           |
| AP1B1P1     | 0.0039      | -1.2225         | -3.3010         | -2.2233         | 0.1108           | 0.0005           | 0.0131           |
| APBA2       | 0.0301      | -0.6110         | -2.6463         | -2.0299         | 0.2706           | 0.0041           | 0.0212           |
| APBB1       | 0.0225      | -1.3530         | -2.6569         | -1.5419         | 0.0880           | 0.0039           | 0.0615           |
| APOC1       | 0.0010      | -3.1423         | -2.6675         | -0.3513         | 0.0008           | 0.0038           | 0.3627           |
| APOC4-APOC2 | 0.0337      | -1.4842         | -2.4351         | -1.2494         | 0.0689           | 0.0074           | 0.1058           |
| APOE        | 0.0419      | -1.1784         | -2.4452         | -1.4639         | 0.1193           | 0.0072           | 0.0716           |
| AQP6        | 0.0349      | -0.3615         | -2.5763         | -2.1327         | 0.3589           | 0.0050           | 0.0165           |
| BICC1       | 0.0407      | -1.3530         | -2.4028         | -1.3077         | 0.0880           | 0.0081           | 0.0955           |
| BMP1        | 0.0289      | -0.0436         | -2.5934         | -2.3617         | 0.4826           | 0.0048           | 0.0091           |
| C10orf11    | 0.0309      | -1.2657         | -2.5510         | -1.5029         | 0.1028           | 0.0054           | 0.0664           |
| C17orf49    | 0.0362      | -1.1347         | -2.5193         | -1.5614         | 0.1282           | 0.0059           | 0.0592           |

|          |        |         |         |         |        |        |        |
|----------|--------|---------|---------|---------|--------|--------|--------|
| C19orf84 | 0.0092 | -1.8452 | -2.8200 | -1.3621 | 0.0325 | 0.0024 | 0.0866 |
| C1orf105 | 0.0368 | -0.2856 | -2.5468 | -2.1564 | 0.3876 | 0.0054 | 0.0155 |
| C1orf54  | 0.0207 | -2.2695 | -2.1170 | -0.4294 | 0.0116 | 0.0171 | 0.3338 |
| C1QA     | 0.0228 | -2.1604 | -2.1752 | -0.5563 | 0.0154 | 0.0148 | 0.2890 |
| C1QTNF6  | 0.0281 | -0.2400 | -2.6410 | -2.2738 | 0.4051 | 0.0041 | 0.0115 |
| C1S      | 0.0157 | -1.8330 | -2.6039 | -1.1711 | 0.0334 | 0.0046 | 0.1208 |
| C3       | 0.0090 | -2.2040 | -2.6092 | -0.9271 | 0.0138 | 0.0045 | 0.1769 |
| C3AR1    | 0.0113 | -2.1822 | -2.5193 | -0.8588 | 0.0145 | 0.0059 | 0.1952 |
| C5orf58  | 0.0243 | -2.3089 | -1.9680 | -0.2655 | 0.0105 | 0.0245 | 0.3953 |
| CACNA2D4 | 0.0119 | -1.6366 | -2.8104 | -1.4931 | 0.0509 | 0.0025 | 0.0677 |
| CACNG5   | 0.0495 | -1.4108 | -2.2878 | -1.1628 | 0.0791 | 0.0111 | 0.1225 |
| CALD1    | 0.0226 | -0.6983 | -2.7521 | -2.0689 | 0.2425 | 0.0030 | 0.0193 |
| CALHM2   | 0.0276 | -0.7419 | -2.6780 | -1.9713 | 0.2291 | 0.0037 | 0.0243 |
| CAMP     | 0.0034 | -2.7993 | -2.5035 | -0.4303 | 0.0026 | 0.0061 | 0.3335 |
| CATSPER1 | 0.0066 | -2.4877 | -2.5087 | -0.6441 | 0.0064 | 0.0061 | 0.2598 |
| CBLB     | 0.0021 | -2.4877 | -3.0168 | -1.1125 | 0.0064 | 0.0013 | 0.1330 |
| CCBE1    | 0.0152 | -1.6148 | -2.7204 | -1.4248 | 0.0532 | 0.0033 | 0.0771 |
| CCL3     | 0.0452 | -2.0294 | -1.8894 | -0.3806 | 0.0212 | 0.0294 | 0.3517 |
| CCL7     | 0.0280 | -1.3340 | -2.5725 | -1.4768 | 0.0911 | 0.0050 | 0.0699 |
| CCR1     | 0.0125 | -2.4222 | -2.2388 | -0.4392 | 0.0077 | 0.0126 | 0.3303 |
| CCR5     | 0.0225 | -1.3530 | -2.6569 | -1.5419 | 0.0880 | 0.0039 | 0.0615 |
| CCR8     | 0.0460 | -1.6183 | -2.2171 | -0.9585 | 0.0528 | 0.0133 | 0.1689 |
| CD14     | 0.0191 | -1.1347 | -2.7733 | -1.7957 | 0.1282 | 0.0028 | 0.0363 |
| CD163    | 0.0281 | -1.9858 | -2.2176 | -0.7124 | 0.0235 | 0.0133 | 0.2381 |
| CD300LF  | 0.0161 | -2.4877 | -2.0006 | -0.1757 | 0.0064 | 0.0227 | 0.4303 |
| CD4      | 0.0073 | -2.5750 | -2.3605 | -0.4489 | 0.0050 | 0.0091 | 0.3267 |
| CD68     | 0.0085 | -1.9421 | -2.7998 | -1.2784 | 0.0261 | 0.0026 | 0.1005 |
| CD83     | 0.0033 | -2.7495 | -2.5722 | -0.5270 | 0.0030 | 0.0051 | 0.2991 |
| CD84     | 0.0105 | -2.2913 | -2.4610 | -0.7319 | 0.0110 | 0.0069 | 0.2321 |
| CDH11    | 0.0389 | -1.0693 | -2.5034 | -1.5907 | 0.1425 | 0.0062 | 0.0558 |
| CEP41    | 0.0123 | -1.8549 | -2.6939 | -1.2394 | 0.0318 | 0.0035 | 0.1076 |
| CHRM2    | 0.0207 | -1.2826 | -2.7092 | -1.6373 | 0.0998 | 0.0034 | 0.0508 |
| CKLF     | 0.0467 | -1.8767 | -2.0218 | -0.6051 | 0.0303 | 0.0216 | 0.2726 |



|               |        |         |         |         |        |        |        |
|---------------|--------|---------|---------|---------|--------|--------|--------|
| CKLF-CMTM1    | 0.0215 | -1.5275 | -2.6145 | -1.3858 | 0.0633 | 0.0045 | 0.0829 |
| CLMP          | 0.0229 | -2.0076 | -2.3076 | -0.7807 | 0.0223 | 0.0105 | 0.2175 |
| CMKLR1        | 0.0146 | -1.5057 | -2.7786 | -1.5517 | 0.0661 | 0.0027 | 0.0604 |
| CMTM3         | 0.0116 | -1.3530 | -2.9109 | -1.7761 | 0.0880 | 0.0018 | 0.0379 |
| CNPY4         | 0.0298 | -1.4402 | -2.5087 | -1.3467 | 0.0749 | 0.0061 | 0.0890 |
| CNRIP1        | 0.0398 | -0.8292 | -2.5298 | -1.7761 | 0.2035 | 0.0057 | 0.0379 |
| COL24A1       | 0.0248 | -0.8729 | -2.7098 | -1.9128 | 0.1914 | 0.0034 | 0.0279 |
| COL3A1        | 0.0216 | -0.3273 | -2.7468 | -2.3129 | 0.3717 | 0.0030 | 0.0104 |
| COL5A2        | 0.0176 | -0.7201 | -2.8421 | -2.1372 | 0.2357 | 0.0022 | 0.0163 |
| COL6A3        | 0.0176 | -0.7201 | -2.8421 | -2.1372 | 0.2357 | 0.0022 | 0.0163 |
| CREB5         | 0.0317 | -2.0731 | -2.0694 | -0.5172 | 0.0191 | 0.0193 | 0.3025 |
| CRIP1         | 0.0257 | -2.2913 | -1.9530 | -0.2635 | 0.0110 | 0.0254 | 0.3961 |
| CRISPLD2      | 0.0287 | -0.1091 | -2.6092 | -2.3324 | 0.4566 | 0.0045 | 0.0098 |
| CRTAP         | 0.0485 | -1.0474 | -2.4134 | -1.5224 | 0.1474 | 0.0079 | 0.0640 |
| CSF1          | 0.0354 | -0.9602 | -2.5616 | -1.7176 | 0.1685 | 0.0052 | 0.0429 |
| CSF1R         | 0.0150 | -1.3311 | -2.8209 | -1.7078 | 0.0916 | 0.0024 | 0.0438 |
| CSMD2         | 0.0363 | -0.0218 | -2.5034 | -2.2934 | 0.4913 | 0.0062 | 0.0109 |
| CTAGE3P       | 0.0176 | -2.0103 | -2.4379 | -0.8991 | 0.0222 | 0.0074 | 0.1843 |
| CTB-60B18.6   | 0.0110 | -0.2141 | -2.9593 | -2.5848 | 0.4152 | 0.0015 | 0.0049 |
| CTD-2022H16.3 | 0.0368 | -0.2856 | -2.5468 | -2.1564 | 0.3876 | 0.0054 | 0.0155 |
| CTD-3187F8.6  | 0.0256 | -0.3192 | -2.6853 | -2.2616 | 0.3748 | 0.0036 | 0.0119 |
| CTGF          | 0.0215 | -1.5275 | -2.6145 | -1.3858 | 0.0633 | 0.0045 | 0.0829 |
| CTSK          | 0.0246 | -1.7894 | -2.4240 | -1.0345 | 0.0368 | 0.0077 | 0.1505 |
| CXCL5         | 0.0041 | -2.3786 | -2.8209 | -1.0052 | 0.0087 | 0.0024 | 0.1574 |
| CXCR6         | 0.0309 | -2.3131 | -1.7889 | -0.0976 | 0.0104 | 0.0368 | 0.4611 |
| CYBB          | 0.0028 | -2.8150 | -2.5881 | -0.4977 | 0.0024 | 0.0048 | 0.3093 |
| CYLC2         | 0.0250 | -1.7642 | -2.4316 | -1.0584 | 0.0389 | 0.0075 | 0.1449 |
| DAB2          | 0.0298 | -2.2258 | -1.9371 | -0.2928 | 0.0130 | 0.0264 | 0.3848 |
| DCK           | 0.0056 | -2.8368 | -2.1700 | -0.0976 | 0.0023 | 0.0150 | 0.4611 |
| DCN           | 0.0281 | -1.9858 | -2.2176 | -0.7124 | 0.0235 | 0.0133 | 0.2381 |
| DCSTAMP       | 0.0426 | -1.8411 | -2.1050 | -0.7057 | 0.0328 | 0.0176 | 0.2402 |
| DDX4          | 0.0056 | -0.8352 | -3.2225 | -2.4107 | 0.2018 | 0.0006 | 0.0080 |
| DENND5A       | 0.0239 | -2.2040 | -2.1011 | -0.4587 | 0.0138 | 0.0178 | 0.3232 |

|           |        |         |         |         |        |        |        |
|-----------|--------|---------|---------|---------|--------|--------|--------|
| DMBX1     | 0.0497 | -0.4383 | -2.4452 | -1.9603 | 0.3306 | 0.0072 | 0.0250 |
| DNAJC22   | 0.0419 | -1.1784 | -2.4452 | -1.4639 | 0.1193 | 0.0072 | 0.0716 |
| DOCK11    | 0.0484 | -2.1604 | -1.6672 | -0.0878 | 0.0154 | 0.0477 | 0.4650 |
| DUXAP9    | 0.0265 | -2.3786 | -1.8048 | -0.0683 | 0.0087 | 0.0356 | 0.4728 |
| DZIP1     | 0.0287 | -0.1091 | -2.6092 | -2.3324 | 0.4566 | 0.0045 | 0.0098 |
| ELF4      | 0.0449 | -0.1309 | -2.4452 | -2.1665 | 0.4479 | 0.0072 | 0.0151 |
| ENOX1     | 0.0168 | -0.7856 | -2.8580 | -2.1079 | 0.2161 | 0.0021 | 0.0175 |
| EPHB1     | 0.0355 | -0.2182 | -2.5510 | -2.2055 | 0.4136 | 0.0054 | 0.0137 |
| EVA1A     | 0.0141 | -0.9820 | -2.9056 | -2.0201 | 0.1631 | 0.0018 | 0.0217 |
| EVL       | 0.0193 | -2.5095 | -1.8365 | -0.0098 | 0.0060 | 0.0331 | 0.4961 |
| F2R       | 0.0139 | -1.8985 | -2.6198 | -1.1418 | 0.0288 | 0.0044 | 0.1268 |
| F5        | 0.0387 | -1.8985 | -2.1117 | -0.6734 | 0.0288 | 0.0174 | 0.2504 |
| FABP3     | 0.0419 | -1.4621 | -2.3446 | -1.1808 | 0.0719 | 0.0095 | 0.1188 |
| FAM198B   | 0.0262 | -1.0474 | -2.6675 | -1.7566 | 0.1474 | 0.0038 | 0.0395 |
| FAP       | 0.0071 | -2.2258 | -2.6992 | -0.9954 | 0.0130 | 0.0035 | 0.1598 |
| FARP1     | 0.0285 | -0.1746 | -2.6251 | -2.3031 | 0.4307 | 0.0043 | 0.0106 |
| FFAR3     | 0.0452 | -2.0294 | -1.8894 | -0.3806 | 0.0212 | 0.0294 | 0.3517 |
| FGFR1     | 0.0419 | -0.3928 | -2.5087 | -2.0494 | 0.3472 | 0.0061 | 0.0202 |
| FHL3      | 0.0270 | -0.3710 | -2.6727 | -2.2153 | 0.3553 | 0.0038 | 0.0134 |
| FLOT1     | 0.0395 | -2.0949 | -1.9053 | -0.3513 | 0.0181 | 0.0284 | 0.3627 |
| FMNL3     | 0.0192 | -0.5892 | -2.8104 | -2.1958 | 0.2779 | 0.0025 | 0.0141 |
| FN1       | 0.0192 | -0.5892 | -2.8104 | -2.1958 | 0.2779 | 0.0025 | 0.0141 |
| FOXP3     | 0.0062 | -2.6404 | -2.3764 | -0.4196 | 0.0041 | 0.0087 | 0.3374 |
| FSD1L     | 0.0228 | -0.0655 | -2.6833 | -2.4300 | 0.4739 | 0.0036 | 0.0075 |
| FSTL1     | 0.0270 | -0.3710 | -2.6727 | -2.2153 | 0.3553 | 0.0038 | 0.0134 |
| FTH1      | 0.0280 | -0.9820 | -2.6516 | -1.7859 | 0.1631 | 0.0040 | 0.0371 |
| FTH1P10   | 0.0061 | -2.8198 | -2.1341 | -0.0760 | 0.0024 | 0.0164 | 0.4697 |
| FTL       | 0.0089 | -1.3748 | -3.0009 | -1.8445 | 0.0846 | 0.0013 | 0.0326 |
| FXVD2     | 0.0419 | -0.7638 | -2.5140 | -1.8054 | 0.2225 | 0.0060 | 0.0355 |
| FYB       | 0.0036 | -2.8368 | -2.4240 | -0.3318 | 0.0023 | 0.0077 | 0.3700 |
| GABARAPL1 | 0.0338 | -1.4839 | -2.4346 | -1.2492 | 0.0689 | 0.0075 | 0.1058 |
| GALM      | 0.0419 | -1.4621 | -2.3446 | -1.1808 | 0.0719 | 0.0095 | 0.1188 |
| GALNS     | 0.0087 | -1.5493 | -2.9585 | -1.6883 | 0.0606 | 0.0015 | 0.0457 |

|            |        |         |         |         |        |        |        |
|------------|--------|---------|---------|---------|--------|--------|--------|
| GFPT2      | 0.0262 | -0.8074 | -2.6939 | -1.9420 | 0.2097 | 0.0035 | 0.0261 |
| GIMAP4     | 0.0226 | -2.4440 | -1.8206 | -0.0390 | 0.0073 | 0.0343 | 0.4844 |
| GLA        | 0.0015 | -2.9678 | -2.7098 | -0.5075 | 0.0015 | 0.0034 | 0.3059 |
| GLIPR2     | 0.0019 | -2.5968 | -2.9585 | -0.9857 | 0.0047 | 0.0015 | 0.1622 |
| GLIS3      | 0.0224 | -0.1964 | -2.7151 | -2.3714 | 0.4222 | 0.0033 | 0.0089 |
| GNAI2      | 0.0205 | -0.8292 | -2.7839 | -2.0104 | 0.2035 | 0.0027 | 0.0222 |
| GNG10      | 0.0152 | -2.4004 | -2.1488 | -0.3708 | 0.0082 | 0.0158 | 0.3554 |
| GOLM1      | 0.0262 | -0.8074 | -2.6939 | -1.9420 | 0.2097 | 0.0035 | 0.0261 |
| GPC6       | 0.0187 | -1.4839 | -2.6886 | -1.4834 | 0.0689 | 0.0036 | 0.0690 |
| GPR141     | 0.0032 | -2.5531 | -2.7786 | -0.8490 | 0.0053 | 0.0027 | 0.1979 |
| GPR176     | 0.0398 | -0.8292 | -2.5298 | -1.7761 | 0.2035 | 0.0057 | 0.0379 |
| GPR42      | 0.0053 | -2.1406 | -2.8728 | -1.2126 | 0.0162 | 0.0020 | 0.1126 |
| GPR84      | 0.0229 | -2.0076 | -2.3076 | -0.7807 | 0.0223 | 0.0105 | 0.2175 |
| GPR85      | 0.0408 | -0.4583 | -2.5246 | -2.0201 | 0.3234 | 0.0058 | 0.0217 |
| GRIA3      | 0.0381 | -1.6366 | -2.3023 | -1.0247 | 0.0509 | 0.0107 | 0.1528 |
| GRINA      | 0.0070 | -2.5313 | -2.4346 | -0.5465 | 0.0057 | 0.0075 | 0.2924 |
| GTF2IP23   | 0.0414 | -2.1827 | -1.7575 | -0.1562 | 0.0145 | 0.0394 | 0.4379 |
| GUCY1A3    | 0.0176 | -0.7201 | -2.8421 | -2.1372 | 0.2357 | 0.0022 | 0.0163 |
| GUCY1B3    | 0.0132 | -1.5712 | -2.7945 | -1.5224 | 0.0581 | 0.0026 | 0.0640 |
| GXYLT1P5   | 0.0499 | -1.6207 | -2.1742 | -0.9172 | 0.0525 | 0.0148 | 0.1795 |
| GYG2       | 0.0333 | -0.4146 | -2.5986 | -2.1177 | 0.3392 | 0.0047 | 0.0171 |
| HAS2       | 0.0374 | -1.7457 | -2.2440 | -0.8978 | 0.0404 | 0.0124 | 0.1846 |
| HIST1H2BL  | 0.0204 | -2.3755 | -1.9944 | -0.2452 | 0.0088 | 0.0231 | 0.4032 |
| HLA-DOA    | 0.0215 | -2.1167 | -2.2493 | -0.6539 | 0.0171 | 0.0122 | 0.2566 |
| HLA-DPB1   | 0.0092 | -1.6585 | -2.9003 | -1.5614 | 0.0486 | 0.0019 | 0.0592 |
| HLA-F      | 0.0484 | -2.1604 | -1.6672 | -0.0878 | 0.0154 | 0.0477 | 0.4650 |
| HNRNPA1P66 | 0.0116 | -1.5457 | -2.8524 | -1.5929 | 0.0611 | 0.0022 | 0.0556 |
| HRH2       | 0.0178 | -2.3349 | -2.1329 | -0.4001 | 0.0098 | 0.0165 | 0.3445 |
| HSD3B2     | 0.0152 | -2.0455 | -2.4805 | -0.9148 | 0.0204 | 0.0066 | 0.1802 |
| HSP90AB7P  | 0.0312 | -2.2580 | -1.8620 | -0.2020 | 0.0120 | 0.0313 | 0.4200 |
| HTN3       | 0.0056 | -2.8679 | -2.1190 | -0.0298 | 0.0021 | 0.0170 | 0.4881 |
| HTRA3      | 0.0449 | -0.1309 | -2.4452 | -2.1665 | 0.4479 | 0.0072 | 0.0151 |
| IFI30      | 0.0052 | -2.5095 | -2.5986 | -0.7124 | 0.0060 | 0.0047 | 0.2381 |

|          |        |         |         |         |        |        |        |
|----------|--------|---------|---------|---------|--------|--------|--------|
| IFITM2   | 0.0419 | -1.4621 | -2.3446 | -1.1808 | 0.0719 | 0.0095 | 0.1188 |
| IFT43    | 0.0216 | -0.7638 | -2.7680 | -2.0396 | 0.2225 | 0.0028 | 0.0207 |
| IGFBPL1  | 0.0081 | -1.2359 | -3.0598 | -1.9919 | 0.1082 | 0.0011 | 0.0232 |
| IL1R1    | 0.0010 | -3.0987 | -2.7415 | -0.4489 | 0.0010 | 0.0031 | 0.3267 |
| IL2      | 0.0188 | -2.4023 | -2.0133 | -0.2446 | 0.0081 | 0.0220 | 0.4034 |
| IL32     | 0.0025 | -2.9678 | -2.4557 | -0.2733 | 0.0015 | 0.0070 | 0.3923 |
| ILK      | 0.0248 | -1.6803 | -2.4822 | -1.1613 | 0.0465 | 0.0065 | 0.1228 |
| INHBA    | 0.0205 | -0.4583 | -2.7786 | -2.2543 | 0.3234 | 0.0027 | 0.0121 |
| INSM1    | 0.0459 | -0.6328 | -2.4822 | -1.8640 | 0.2634 | 0.0065 | 0.0312 |
| ITGA5    | 0.0192 | -0.5892 | -2.8104 | -2.1958 | 0.2779 | 0.0025 | 0.0141 |
| ITGAM    | 0.0260 | -1.3966 | -2.5828 | -1.4443 | 0.0813 | 0.0049 | 0.0743 |
| ITGB1    | 0.0452 | -1.1129 | -2.4293 | -1.4931 | 0.1329 | 0.0076 | 0.0677 |
| ITGB2    | 0.0419 | -1.1784 | -2.4452 | -1.4639 | 0.1193 | 0.0072 | 0.0716 |
| JAM3     | 0.0485 | -1.0474 | -2.4134 | -1.5224 | 0.1474 | 0.0079 | 0.0640 |
| KCNE3    | 0.0380 | -2.0512 | -1.9794 | -0.4489 | 0.0201 | 0.0239 | 0.3267 |
| KCNJ8    | 0.0308 | -1.6585 | -2.3922 | -1.0930 | 0.0486 | 0.0084 | 0.1372 |
| KCNK13   | 0.0354 | -0.9602 | -2.5616 | -1.7176 | 0.1685 | 0.0052 | 0.0429 |
| KCTD17   | 0.0444 | -0.1964 | -2.4610 | -2.1372 | 0.4222 | 0.0069 | 0.0163 |
| KDELC1   | 0.0398 | -0.8292 | -2.5298 | -1.7761 | 0.2035 | 0.0057 | 0.0379 |
| KDM4E    | 0.0284 | -1.8215 | -2.3342 | -0.9301 | 0.0343 | 0.0098 | 0.1762 |
| KRT18P59 | 0.0362 | -1.3522 | -2.4553 | -1.3566 | 0.0882 | 0.0070 | 0.0875 |
| KRT8P47  | 0.0163 | -1.0419 | -2.8455 | -1.9245 | 0.1487 | 0.0022 | 0.0271 |
| L3HYPDH  | 0.0493 | -1.9203 | -1.9477 | -0.5075 | 0.0274 | 0.0257 | 0.3059 |
| LAIR1    | 0.0110 | -2.5313 | -2.1805 | -0.3123 | 0.0057 | 0.0146 | 0.3774 |
| LAMB1    | 0.0276 | -0.7419 | -2.6780 | -1.9713 | 0.2291 | 0.0037 | 0.0243 |
| LAMC1    | 0.0246 | -0.5674 | -2.7204 | -2.1275 | 0.2852 | 0.0033 | 0.0167 |
| LAPTM5   | 0.0025 | -2.9678 | -2.4557 | -0.2733 | 0.0015 | 0.0070 | 0.3923 |
| LBH      | 0.0333 | -0.7856 | -2.6039 | -1.8737 | 0.2161 | 0.0046 | 0.0305 |
| LCP2     | 0.0262 | -2.3349 | -1.8789 | -0.1659 | 0.0098 | 0.0301 | 0.4341 |
| LDLRAD4  | 0.0381 | -0.5892 | -2.5563 | -1.9616 | 0.2779 | 0.0053 | 0.0249 |
| LGI2     | 0.0395 | -0.5237 | -2.5404 | -1.9908 | 0.3002 | 0.0055 | 0.0232 |
| LILRB4   | 0.0032 | -2.5531 | -2.7786 | -0.8490 | 0.0053 | 0.0027 | 0.1979 |
| LITAF    | 0.0305 | -2.2695 | -1.8630 | -0.1952 | 0.0116 | 0.0312 | 0.4226 |

|           |        |         |         |         |        |        |        |
|-----------|--------|---------|---------|---------|--------|--------|--------|
| LONRF3    | 0.0362 | -0.0873 | -2.5193 | -2.2641 | 0.4652 | 0.0059 | 0.0118 |
| LPAR1     | 0.0109 | -1.9203 | -2.7098 | -1.2101 | 0.0274 | 0.0034 | 0.1131 |
| LPIN2     | 0.0187 | -2.1822 | -2.2652 | -0.6246 | 0.0145 | 0.0117 | 0.2661 |
| LRRC25    | 0.0444 | -0.1964 | -2.4610 | -2.1372 | 0.4222 | 0.0069 | 0.0163 |
| LTBP1     | 0.0449 | -0.1309 | -2.4452 | -2.1665 | 0.4479 | 0.0072 | 0.0151 |
| LUM       | 0.0094 | -2.0949 | -2.6675 | -1.0540 | 0.0181 | 0.0038 | 0.1459 |
| LXN       | 0.0237 | -1.4621 | -2.5986 | -1.4151 | 0.0719 | 0.0047 | 0.0785 |
| LYSMD2    | 0.0066 | -2.7277 | -2.2282 | -0.2245 | 0.0032 | 0.0129 | 0.4112 |
| 1-Mar     | 0.0478 | -2.1167 | -1.7413 | -0.1854 | 0.0171 | 0.0408 | 0.4264 |
| MARCKSL1  | 0.0362 | -1.1347 | -2.5193 | -1.5614 | 0.1282 | 0.0059 | 0.0592 |
| MBOAT4    | 0.0214 | -1.8230 | -2.4695 | -1.0539 | 0.0342 | 0.0068 | 0.1460 |
| MCOLN2    | 0.0362 | -2.2913 | -1.6989 | -0.0293 | 0.0110 | 0.0447 | 0.4883 |
| MGAT5     | 0.0362 | -0.0873 | -2.5193 | -2.2641 | 0.4652 | 0.0059 | 0.0118 |
| MLLT11    | 0.0494 | -0.5019 | -2.4505 | -1.9225 | 0.3079 | 0.0071 | 0.0273 |
| MMP19     | 0.0175 | -2.1385 | -2.3393 | -0.7222 | 0.0162 | 0.0097 | 0.2351 |
| MMP2      | 0.0205 | -0.4583 | -2.7786 | -2.2543 | 0.3234 | 0.0027 | 0.0121 |
| MMP9      | 0.0150 | -1.3311 | -2.8209 | -1.7078 | 0.0916 | 0.0024 | 0.0438 |
| MORF4L1P1 | 0.0114 | -1.9025 | -2.7027 | -1.2155 | 0.0286 | 0.0034 | 0.1121 |
| MPP1      | 0.0288 | -2.1822 | -2.0112 | -0.3904 | 0.0145 | 0.0222 | 0.3481 |
| MRAS      | 0.0089 | -1.3748 | -3.0009 | -1.8445 | 0.0846 | 0.0013 | 0.0326 |
| MRPL35P3  | 0.0090 | -1.4785 | -2.9665 | -1.7432 | 0.0696 | 0.0015 | 0.0407 |
| MT2A      | 0.0162 | -2.0949 | -2.4134 | -0.8198 | 0.0181 | 0.0079 | 0.2062 |
| MTCYBP18  | 0.0423 | -1.5806 | -2.2818 | -1.0435 | 0.0570 | 0.0112 | 0.1484 |
| MXRA5     | 0.0263 | -0.4364 | -2.6886 | -2.1860 | 0.3313 | 0.0036 | 0.0144 |
| MYO7A     | 0.0193 | -2.5095 | -1.8365 | -0.0098 | 0.0060 | 0.0331 | 0.4961 |
| NECAP2    | 0.0239 | -2.2040 | -2.1011 | -0.4587 | 0.0138 | 0.0178 | 0.3232 |
| NECTIN3   | 0.0205 | -1.0693 | -2.7574 | -1.8249 | 0.1425 | 0.0029 | 0.0340 |
| NID2      | 0.0224 | -0.1964 | -2.7151 | -2.3714 | 0.4222 | 0.0033 | 0.0089 |
| NNMT      | 0.0239 | -2.2040 | -2.1011 | -0.4587 | 0.0138 | 0.0178 | 0.3232 |
| NPTX2     | 0.0408 | -0.4583 | -2.5246 | -2.0201 | 0.3234 | 0.0058 | 0.0217 |
| NT5E      | 0.0097 | -1.3093 | -2.9850 | -1.8737 | 0.0952 | 0.0014 | 0.0305 |
| OLFML1    | 0.0395 | -0.5237 | -2.5404 | -1.9908 | 0.3002 | 0.0055 | 0.0232 |
| OLR1      | 0.0276 | -1.7239 | -2.4081 | -1.0637 | 0.0424 | 0.0080 | 0.1437 |

|            |        |         |         |         |        |        |        |
|------------|--------|---------|---------|---------|--------|--------|--------|
| OR1J1      | 0.0056 | -0.8352 | -3.2225 | -2.4107 | 0.2018 | 0.0006 | 0.0080 |
| OSGIN2     | 0.0362 | -2.0076 | -2.0535 | -0.5465 | 0.0223 | 0.0200 | 0.2924 |
| OSMR       | 0.0343 | -1.5930 | -2.3764 | -1.1223 | 0.0556 | 0.0087 | 0.1309 |
| P4HA1      | 0.0353 | -2.2040 | -1.8471 | -0.2245 | 0.0138 | 0.0324 | 0.4112 |
| PAPSS2     | 0.0262 | -1.0474 | -2.6675 | -1.7566 | 0.1474 | 0.0038 | 0.0395 |
| PAQR8      | 0.0209 | -1.2438 | -2.7151 | -1.6688 | 0.1068 | 0.0033 | 0.0476 |
| PCDH18     | 0.0326 | -1.3748 | -2.4928 | -1.3760 | 0.0846 | 0.0063 | 0.0844 |
| PDE3B      | 0.0257 | -2.2913 | -1.9530 | -0.2635 | 0.0110 | 0.0254 | 0.3961 |
| PDGFRA     | 0.0308 | -1.6585 | -2.3922 | -1.0930 | 0.0486 | 0.0084 | 0.1372 |
| PDK3       | 0.0376 | -0.8947 | -2.5457 | -1.7469 | 0.1855 | 0.0055 | 0.0403 |
| PDLIM3     | 0.0176 | -1.3748 | -2.7468 | -1.6102 | 0.0846 | 0.0030 | 0.0537 |
| PDPN       | 0.0151 | -2.2040 | -2.3552 | -0.6929 | 0.0138 | 0.0093 | 0.2442 |
| PEA15      | 0.0305 | -1.7676 | -2.3340 | -0.9661 | 0.0386 | 0.0098 | 0.1670 |
| PGM2L1     | 0.0226 | -1.1784 | -2.6992 | -1.6981 | 0.1193 | 0.0035 | 0.0447 |
| PHC2       | 0.0038 | -1.8985 | -3.1279 | -1.6102 | 0.0288 | 0.0009 | 0.0537 |
| PHF2P2     | 0.0341 | -0.4872 | -2.5957 | -2.0663 | 0.3130 | 0.0047 | 0.0194 |
| PILRA      | 0.0119 | -2.3786 | -2.3128 | -0.5367 | 0.0087 | 0.0104 | 0.2957 |
| PKD2       | 0.0298 | -0.9165 | -2.6357 | -1.8152 | 0.1797 | 0.0042 | 0.0347 |
| PKIG       | 0.0270 | -0.3710 | -2.6727 | -2.2153 | 0.3553 | 0.0038 | 0.0134 |
| PLAU       | 0.0067 | -2.3349 | -2.6410 | -0.8686 | 0.0098 | 0.0041 | 0.1925 |
| PLAUR      | 0.0362 | -1.1347 | -2.5193 | -1.5614 | 0.1282 | 0.0059 | 0.0592 |
| PLEKHO1    | 0.0056 | -2.5531 | -2.5246 | -0.6148 | 0.0053 | 0.0058 | 0.2693 |
| PLEKHO2    | 0.0066 | -1.9640 | -2.8897 | -1.3467 | 0.0248 | 0.0019 | 0.0890 |
| PLIN2      | 0.0305 | -1.7676 | -2.3340 | -0.9661 | 0.0386 | 0.0098 | 0.1670 |
| PLOD1      | 0.0449 | -0.1309 | -2.4452 | -2.1665 | 0.4479 | 0.0072 | 0.0151 |
| PLOD2      | 0.0229 | -2.0076 | -2.3076 | -0.7807 | 0.0223 | 0.0105 | 0.2175 |
| POPDC2     | 0.0467 | -1.6148 | -2.2123 | -0.9564 | 0.0532 | 0.0135 | 0.1694 |
| POPDC3     | 0.0452 | -1.1129 | -2.4293 | -1.4931 | 0.1329 | 0.0076 | 0.0677 |
| POSTN      | 0.0176 | -1.3748 | -2.7468 | -1.6102 | 0.0846 | 0.0030 | 0.0537 |
| PPP1R18    | 0.0030 | -2.9023 | -2.4399 | -0.3025 | 0.0019 | 0.0073 | 0.3811 |
| PPP1R1A    | 0.0069 | -2.0231 | -2.8373 | -1.2588 | 0.0215 | 0.0023 | 0.1041 |
| PPT1       | 0.0276 | -2.1385 | -2.0853 | -0.4880 | 0.0162 | 0.0185 | 0.3128 |
| PRELID3BP4 | 0.0191 | -2.2548 | -2.1809 | -0.4981 | 0.0121 | 0.0146 | 0.3092 |

|               |        |         |         |         |        |        |        |
|---------------|--------|---------|---------|---------|--------|--------|--------|
| PROCR         | 0.0350 | -0.7201 | -2.5881 | -1.9030 | 0.2357 | 0.0048 | 0.0285 |
| PSAP          | 0.0471 | -0.8729 | -2.4557 | -1.6785 | 0.1914 | 0.0070 | 0.0466 |
| PTPN9         | 0.0092 | -1.6585 | -2.9003 | -1.5614 | 0.0486 | 0.0019 | 0.0592 |
| PTPRJ         | 0.0387 | -1.2438 | -2.4610 | -1.4346 | 0.1068 | 0.0069 | 0.0757 |
| PTPRN         | 0.0324 | -0.4801 | -2.6145 | -2.0884 | 0.3156 | 0.0045 | 0.0184 |
| PTPRO         | 0.0113 | -2.5750 | -2.1064 | -0.2147 | 0.0050 | 0.0176 | 0.4150 |
| PXDN          | 0.0205 | -0.4583 | -2.7786 | -2.2543 | 0.3234 | 0.0027 | 0.0121 |
| R3HDM2P2      | 0.0090 | -1.4785 | -2.9665 | -1.7432 | 0.0696 | 0.0015 | 0.0407 |
| RAB20         | 0.0096 | -1.9858 | -2.7257 | -1.1808 | 0.0235 | 0.0032 | 0.1188 |
| RAB31         | 0.0444 | -1.2875 | -2.3869 | -1.3370 | 0.0990 | 0.0085 | 0.0906 |
| RAB32         | 0.0058 | -2.0294 | -2.9056 | -1.3175 | 0.0212 | 0.0018 | 0.0938 |
| RAB34         | 0.0051 | -1.9858 | -2.9797 | -1.4151 | 0.0235 | 0.0014 | 0.0785 |
| RAB42         | 0.0114 | -1.1784 | -2.9532 | -1.9323 | 0.1193 | 0.0016 | 0.0267 |
| RAI14         | 0.0226 | -0.1309 | -2.6992 | -2.4007 | 0.4479 | 0.0035 | 0.0082 |
| RARB          | 0.0149 | -2.0512 | -2.4875 | -0.9173 | 0.0201 | 0.0064 | 0.1795 |
| RARRES1       | 0.0157 | -1.8330 | -2.6039 | -1.1711 | 0.0334 | 0.0046 | 0.1208 |
| RASL10B       | 0.0456 | -1.7239 | -2.1541 | -0.8295 | 0.0424 | 0.0156 | 0.2034 |
| RASSF4        | 0.0065 | -1.8549 | -2.9480 | -1.4736 | 0.0318 | 0.0016 | 0.0703 |
| RBBP4P1       | 0.0341 | -0.4872 | -2.5957 | -2.0663 | 0.3130 | 0.0047 | 0.0194 |
| RGS10         | 0.0249 | -2.2476 | -2.0271 | -0.3611 | 0.0123 | 0.0213 | 0.3590 |
| RGS3          | 0.0341 | -1.7021 | -2.3181 | -0.9954 | 0.0444 | 0.0102 | 0.1598 |
| RGS8          | 0.0399 | -1.2791 | -2.4376 | -1.3893 | 0.1004 | 0.0074 | 0.0824 |
| RHOC          | 0.0342 | -0.3491 | -2.5828 | -2.1470 | 0.3635 | 0.0049 | 0.0159 |
| RHOG          | 0.0020 | -2.9896 | -2.5457 | -0.3416 | 0.0014 | 0.0055 | 0.3663 |
| RNF130        | 0.0065 | -2.0731 | -2.8315 | -1.2199 | 0.0191 | 0.0023 | 0.1113 |
| RNF148        | 0.0156 | -1.6202 | -2.7094 | -1.4110 | 0.0526 | 0.0034 | 0.0791 |
| RP1-302G2.5   | 0.0345 | -1.7674 | -2.2719 | -0.9090 | 0.0386 | 0.0115 | 0.1817 |
| RP11-154P18.2 | 0.0350 | -2.0767 | -2.0040 | -0.4545 | 0.0189 | 0.0225 | 0.3247 |
| RP11-177C12.4 | 0.0056 | -0.8352 | -3.2225 | -2.4107 | 0.2018 | 0.0006 | 0.0080 |
| RP11-179A10.3 | 0.0321 | -0.5977 | -2.6224 | -2.0168 | 0.2750 | 0.0044 | 0.0219 |
| RP11-231P20.5 | 0.0368 | -0.2856 | -2.5468 | -2.1564 | 0.3876 | 0.0054 | 0.0155 |
| RP11-23E10.4  | 0.0236 | -0.5604 | -2.7360 | -2.1465 | 0.2876 | 0.0031 | 0.0159 |
| RP11-323I15.3 | 0.0247 | -0.4200 | -2.7098 | -2.2165 | 0.3372 | 0.0034 | 0.0133 |

|                |        |         |         |         |        |        |        |
|----------------|--------|---------|---------|---------|--------|--------|--------|
| RP11-369J21.11 | 0.0247 | -0.4200 | -2.7098 | -2.2165 | 0.3372 | 0.0034 | 0.0133 |
| RP11-380G5.3   | 0.0275 | -0.0487 | -2.6119 | -2.3753 | 0.4806 | 0.0045 | 0.0088 |
| RP11-452D12.1  | 0.0427 | -2.1454 | -1.7873 | -0.2086 | 0.0160 | 0.0369 | 0.4174 |
| RP11-460N20.3  | 0.0431 | -0.8530 | -2.4948 | -1.7279 | 0.1968 | 0.0063 | 0.0420 |
| RP11-478C6.2   | 0.0064 | -1.5741 | -3.0625 | -1.7675 | 0.0577 | 0.0011 | 0.0386 |
| RP11-494O16.3  | 0.0179 | -0.6523 | -2.8356 | -2.1767 | 0.2571 | 0.0023 | 0.0148 |
| RP11-545A16.3  | 0.0403 | -1.0960 | -2.4829 | -1.5539 | 0.1365 | 0.0065 | 0.0601 |
| RP11-571M6.15  | 0.0106 | -1.8395 | -2.7626 | -1.3130 | 0.0329 | 0.0029 | 0.0946 |
| RP11-599J14.2  | 0.0114 | -1.9025 | -2.7027 | -1.2155 | 0.0286 | 0.0034 | 0.1121 |
| RP11-613M5.2   | 0.0500 | -2.1061 | -1.7216 | -0.1744 | 0.0176 | 0.0426 | 0.4308 |
| RP11-624L12.1  | 0.0381 | -1.1676 | -2.4891 | -1.5116 | 0.1215 | 0.0064 | 0.0653 |
| RP11-75L1.2    | 0.0095 | -2.6404 | -2.1223 | -0.1854 | 0.0041 | 0.0169 | 0.4264 |
| RP11-8H2.1     | 0.0085 | -1.7311 | -2.9025 | -1.5147 | 0.0417 | 0.0019 | 0.0649 |
| RP13-977J11.5  | 0.0146 | -1.6129 | -2.7383 | -1.4426 | 0.0534 | 0.0031 | 0.0746 |
| RP3-341D10.1   | 0.0247 | -0.4200 | -2.7098 | -2.2165 | 0.3372 | 0.0034 | 0.0133 |
| RP3-370M22.8   | 0.0148 | -2.4432 | -2.1147 | -0.3107 | 0.0073 | 0.0172 | 0.3780 |
| RP4-559A3.7    | 0.0003 | -2.3363 | -3.7820 | -1.9196 | 0.0097 | 0.0001 | 0.0275 |
| RP4-576H24.2   | 0.0135 | -1.3929 | -2.8428 | -1.6865 | 0.0818 | 0.0022 | 0.0459 |
| RP5-928E24.4   | 0.0014 | -0.9610 | -3.6282 | -2.7004 | 0.1683 | 0.0001 | 0.0035 |
| RPA4           | 0.0022 | -2.2415 | -3.1437 | -1.3947 | 0.0125 | 0.0008 | 0.0816 |
| RPL12P10       | 0.0149 | -0.3532 | -2.8793 | -2.4177 | 0.3620 | 0.0020 | 0.0078 |
| RPL21P40       | 0.0325 | -1.4486 | -2.4664 | -1.3021 | 0.0737 | 0.0068 | 0.0964 |
| RPL23AP88      | 0.0009 | -0.2458 | -3.6964 | -3.2430 | 0.4029 | 0.0001 | 0.0006 |
| RPL29P24       | 0.0231 | -1.5936 | -2.5555 | -1.2871 | 0.0555 | 0.0053 | 0.0990 |
| RPL35AP32      | 0.0459 | -0.5544 | -2.4816 | -1.9160 | 0.2896 | 0.0065 | 0.0277 |
| RTN1           | 0.0494 | -0.5019 | -2.4505 | -1.9225 | 0.3079 | 0.0071 | 0.0273 |
| S100A4         | 0.0098 | -2.2476 | -2.5351 | -0.8295 | 0.0123 | 0.0056 | 0.2034 |
| S1PR3          | 0.0078 | -1.6148 | -2.9744 | -1.6590 | 0.0532 | 0.0015 | 0.0486 |
| SALL1          | 0.0429 | -0.3273 | -2.4928 | -2.0787 | 0.3717 | 0.0063 | 0.0188 |
| SCARA3         | 0.0221 | -0.2619 | -2.7310 | -2.3422 | 0.3967 | 0.0032 | 0.0096 |
| SCCPDH         | 0.0344 | -2.1604 | -1.9212 | -0.3220 | 0.0154 | 0.0274 | 0.3737 |
| SCG5           | 0.0237 | -1.4621 | -2.5986 | -1.4151 | 0.0719 | 0.0047 | 0.0785 |
| SCIMP          | 0.0309 | -2.3131 | -1.7889 | -0.0976 | 0.0104 | 0.0368 | 0.4611 |



|           |        |         |         |         |        |        |        |
|-----------|--------|---------|---------|---------|--------|--------|--------|
| SDC2      | 0.0497 | -0.8074 | -2.4399 | -1.7078 | 0.2097 | 0.0073 | 0.0438 |
| SDCBP     | 0.0341 | -1.7021 | -2.3181 | -0.9954 | 0.0444 | 0.0102 | 0.1598 |
| SDK1      | 0.0228 | -0.0655 | -2.6833 | -2.4300 | 0.4739 | 0.0036 | 0.0075 |
| SERPINE1  | 0.0194 | -1.5930 | -2.6304 | -1.3565 | 0.0556 | 0.0043 | 0.0875 |
| SERPINE3  | 0.0447 | -1.2116 | -2.4075 | -1.4068 | 0.1128 | 0.0080 | 0.0797 |
| SERPINF1  | 0.0359 | -0.1528 | -2.5351 | -2.2348 | 0.4393 | 0.0056 | 0.0127 |
| SERPINH1  | 0.0237 | -0.6328 | -2.7363 | -2.0982 | 0.2634 | 0.0031 | 0.0179 |
| SGCB      | 0.0467 | -1.8767 | -2.0218 | -0.6051 | 0.0303 | 0.0216 | 0.2726 |
| SHC3      | 0.0126 | -1.2875 | -2.8950 | -1.8054 | 0.0990 | 0.0019 | 0.0355 |
| SIGLEC17P | 0.0038 | -2.2258 | -2.9532 | -1.2296 | 0.0130 | 0.0016 | 0.1094 |
| SIGLEC7   | 0.0157 | -2.4440 | -2.0747 | -0.2733 | 0.0073 | 0.0190 | 0.3923 |
| SIGLEC9   | 0.0062 | -2.6404 | -2.3764 | -0.4196 | 0.0041 | 0.0087 | 0.3374 |
| SLAMF8    | 0.0012 | -3.0332 | -2.7257 | -0.4782 | 0.0012 | 0.0032 | 0.3163 |
| SLC11A1   | 0.0228 | -2.1604 | -2.1752 | -0.5563 | 0.0154 | 0.0148 | 0.2890 |
| SLC20A1   | 0.0257 | -2.2913 | -1.9530 | -0.2635 | 0.0110 | 0.0254 | 0.3961 |
| SLC39A14  | 0.0280 | -0.9820 | -2.6516 | -1.7859 | 0.1631 | 0.0040 | 0.0371 |
| SLC47A1P1 | 0.0368 | -0.2856 | -2.5468 | -2.1564 | 0.3876 | 0.0054 | 0.0155 |
| SLC8A1    | 0.0237 | -1.4621 | -2.5986 | -1.4151 | 0.0719 | 0.0047 | 0.0785 |
| SMARCA1   | 0.0301 | -0.6110 | -2.6463 | -2.0299 | 0.2706 | 0.0041 | 0.0212 |
| SMTNL1    | 0.0279 | -2.1917 | -2.0200 | -0.3921 | 0.0142 | 0.0217 | 0.3475 |
| SMURF2    | 0.0077 | -2.2695 | -2.6251 | -0.8978 | 0.0116 | 0.0043 | 0.1846 |
| SOAT1     | 0.0135 | -2.0076 | -2.5616 | -1.0149 | 0.0223 | 0.0052 | 0.1551 |
| SPATA13   | 0.0118 | -2.0731 | -2.5775 | -0.9857 | 0.0191 | 0.0050 | 0.1622 |
| SPATA20P1 | 0.0482 | -1.2220 | -2.3711 | -1.3663 | 0.1108 | 0.0089 | 0.0859 |
| SRMP2     | 0.0090 | -1.4785 | -2.9665 | -1.7432 | 0.0696 | 0.0015 | 0.0407 |
| SRPX2     | 0.0056 | -2.5531 | -2.5246 | -0.6148 | 0.0053 | 0.0058 | 0.2693 |
| SSH1      | 0.0362 | -0.0873 | -2.5193 | -2.2641 | 0.4652 | 0.0059 | 0.0118 |
| ST8SIA2   | 0.0087 | -1.5493 | -2.9585 | -1.6883 | 0.0606 | 0.0015 | 0.0457 |
| STAC3     | 0.0220 | -1.6366 | -2.5563 | -1.2589 | 0.0509 | 0.0053 | 0.1040 |
| STMN3     | 0.0494 | -0.5019 | -2.4505 | -1.9225 | 0.3079 | 0.0071 | 0.0273 |
| SULF1     | 0.0089 | -1.3748 | -3.0009 | -1.8445 | 0.0846 | 0.0013 | 0.0326 |
| SULT1C2   | 0.0338 | -1.4839 | -2.4346 | -1.2492 | 0.0689 | 0.0075 | 0.1058 |
| SV2A      | 0.0168 | -0.7856 | -2.8580 | -2.1079 | 0.2161 | 0.0021 | 0.0175 |

|          |        |         |         |         |        |        |        |
|----------|--------|---------|---------|---------|--------|--------|--------|
| TATDN2P3 | 0.0398 | -1.7161 | -2.2324 | -0.9070 | 0.0431 | 0.0128 | 0.1822 |
| TBATA    | 0.0152 | -1.2391 | -2.8384 | -1.7856 | 0.1076 | 0.0023 | 0.0371 |
| TBC1D4   | 0.0193 | -2.5095 | -1.8365 | -0.0098 | 0.0060 | 0.0331 | 0.4961 |
| TDO2     | 0.0103 | -2.1385 | -2.5934 | -0.9564 | 0.0162 | 0.0048 | 0.1694 |
| TGFBI    | 0.0194 | -1.5930 | -2.6304 | -1.3565 | 0.0556 | 0.0043 | 0.0875 |
| THY1     | 0.0270 | -0.3710 | -2.6727 | -2.2153 | 0.3553 | 0.0038 | 0.0134 |
| TIMP1    | 0.0419 | -1.6803 | -2.2282 | -0.9271 | 0.0465 | 0.0129 | 0.1769 |
| TIMP2    | 0.0313 | -0.5455 | -2.6304 | -2.0591 | 0.2927 | 0.0043 | 0.0197 |
| TLR2     | 0.0080 | -2.7059 | -2.1382 | -0.1561 | 0.0034 | 0.0163 | 0.4380 |
| TLR8     | 0.0037 | -2.8805 | -2.3499 | -0.2342 | 0.0020 | 0.0094 | 0.4074 |
| TMEM119  | 0.0326 | -1.3748 | -2.4928 | -1.3760 | 0.0846 | 0.0063 | 0.0844 |
| TMEM2    | 0.0132 | -1.0474 | -2.9215 | -1.9908 | 0.1474 | 0.0017 | 0.0232 |
| TMSB4X   | 0.0408 | -0.4583 | -2.5246 | -2.0201 | 0.3234 | 0.0058 | 0.0217 |
| TNFAIP6  | 0.0306 | -1.5493 | -2.4505 | -1.2199 | 0.0606 | 0.0071 | 0.1113 |
| TNFSF11  | 0.0319 | -1.9203 | -2.2017 | -0.7417 | 0.0274 | 0.0138 | 0.2291 |
| TNFSF13  | 0.0036 | -2.8368 | -2.4240 | -0.3318 | 0.0023 | 0.0077 | 0.3700 |
| TNFSF4   | 0.0022 | -2.8368 | -2.6780 | -0.5660 | 0.0023 | 0.0037 | 0.2857 |
| TNNI2    | 0.0123 | -1.8549 | -2.6939 | -1.2394 | 0.0318 | 0.0035 | 0.1076 |
| TPM1     | 0.0245 | -1.2875 | -2.6410 | -1.5712 | 0.0990 | 0.0041 | 0.0581 |
| TPM2     | 0.0266 | -1.2220 | -2.6251 | -1.6005 | 0.1108 | 0.0043 | 0.0547 |
| TPSB2    | 0.0380 | -2.0512 | -1.9794 | -0.4489 | 0.0201 | 0.0239 | 0.3267 |
| TPST1    | 0.0343 | -1.5930 | -2.3764 | -1.1223 | 0.0556 | 0.0087 | 0.1309 |
| TRAJ6    | 0.0287 | -0.7607 | -2.6619 | -1.9439 | 0.2234 | 0.0039 | 0.0260 |
| TRAV12-2 | 0.0005 | -3.4922 | -2.5833 | -0.0390 | 0.0002 | 0.0049 | 0.4844 |
| TRAV13-1 | 0.0162 | -2.0949 | -2.4134 | -0.8198 | 0.0181 | 0.0079 | 0.2062 |
| TRAV16   | 0.0153 | -2.5508 | -1.9413 | -0.0787 | 0.0054 | 0.0261 | 0.4686 |
| TRAV22   | 0.0417 | -1.1794 | -2.4473 | -1.4651 | 0.1191 | 0.0072 | 0.0714 |
| TRAV26-1 | 0.0113 | -2.6243 | -2.0368 | -0.1174 | 0.0043 | 0.0208 | 0.4533 |
| TRAV26-2 | 0.0036 | -2.8538 | -2.4061 | -0.3039 | 0.0022 | 0.0081 | 0.3806 |
| TRAV38-1 | 0.0399 | -2.2430 | -1.6960 | -0.0590 | 0.0124 | 0.0449 | 0.4765 |
| TRAV39   | 0.0104 | -1.5145 | -2.9052 | -1.6625 | 0.0650 | 0.0018 | 0.0482 |
| TRAV8-4  | 0.0309 | -2.3131 | -1.7889 | -0.0976 | 0.0104 | 0.0368 | 0.4611 |
| TRBV10-3 | 0.0091 | -2.6025 | -2.2012 | -0.2836 | 0.0046 | 0.0139 | 0.3883 |

|                |        |         |         |         |        |        |        |
|----------------|--------|---------|---------|---------|--------|--------|--------|
| TREM1          | 0.0157 | -2.4440 | -2.0747 | -0.2733 | 0.0073 | 0.0190 | 0.3923 |
| TRPC4          | 0.0170 | -2.2913 | -2.2070 | -0.4977 | 0.0110 | 0.0137 | 0.3093 |
| TRPM2          | 0.0261 | -1.9421 | -2.2917 | -0.8100 | 0.0261 | 0.0110 | 0.2090 |
| TSPAN15        | 0.0419 | -0.7638 | -2.5140 | -1.8054 | 0.2225 | 0.0060 | 0.0355 |
| TSPAN9         | 0.0263 | -0.4364 | -2.6886 | -2.1860 | 0.3313 | 0.0036 | 0.0144 |
| TSPYL5         | 0.0452 | -0.0655 | -2.4293 | -2.1958 | 0.4739 | 0.0076 | 0.0141 |
| TTN            | 0.0398 | -0.8292 | -2.5298 | -1.7761 | 0.2035 | 0.0057 | 0.0379 |
| TYROBP         | 0.0221 | -1.7457 | -2.4981 | -1.1320 | 0.0404 | 0.0062 | 0.1288 |
| UNC13A         | 0.0152 | -2.4004 | -2.1488 | -0.3708 | 0.0082 | 0.0158 | 0.3554 |
| VEGFC          | 0.0439 | -0.6983 | -2.4981 | -1.8347 | 0.2425 | 0.0062 | 0.0333 |
| WISP1          | 0.0066 | -1.5712 | -3.0485 | -1.7566 | 0.0581 | 0.0011 | 0.0395 |
| Xbac-BPG32J3.1 | 0.0368 | -0.2856 | -2.5468 | -2.1564 | 0.3876 | 0.0054 | 0.0155 |
| Xbac-BPG554J19 | 0.0252 | -0.9671 | -2.6933 | -1.8343 | 0.1668 | 0.0035 | 0.0333 |
| YWHAH          | 0.0220 | -1.6366 | -2.5563 | -1.2589 | 0.0509 | 0.0053 | 0.1040 |
| ZNF816-ZNF321F | 0.0179 | -1.6801 | -2.6242 | -1.2924 | 0.0465 | 0.0043 | 0.0981 |
| ZNF826P        | 0.0215 | -2.3131 | -2.0429 | -0.3318 | 0.0104 | 0.0205 | 0.3700 |

**Table S2B List of genes whose expression level are decreased in low-risk group**

|               | all (p-val) | G1 vs G2 (stat) | G1 vs G3 (stat) | G2 vs G3 (stat) | G1 vs G2 (p-val) | G1 vs G3 (p-val) | G2 vs G3 (p-val) |
|---------------|-------------|-----------------|-----------------|-----------------|------------------|------------------|------------------|
| AC090945.1    | 0.0270      | 2.0988          | 2.1379          | 0.5632          | 0.0179           | 0.0163           | 0.2867           |
| ACER2         | 0.0270      | 1.5057          | 2.5246          | 1.3175          | 0.0661           | 0.0058           | 0.0938           |
| ACTG1P1       | 0.0035      | 2.5968          | 2.7045          | 0.7514          | 0.0047           | 0.0034           | 0.2262           |
| ACTR3C        | 0.0287      | 1.1566          | 2.6092          | 1.6298          | 0.1237           | 0.0045           | 0.0516           |
| AFG3L1P       | 0.0419      | 0.3928          | 2.5087          | 2.0494          | 0.3472           | 0.0061           | 0.0202           |
| AL592183.1    | 0.0363      | 0.0218          | 2.5034          | 2.2934          | 0.4913           | 0.0062           | 0.0109           |
| ALDH5A1       | 0.0106      | 1.4184          | 2.9268          | 1.7469          | 0.0780           | 0.0017           | 0.0403           |
| ALX3          | 0.0493      | 1.7676          | 2.0800          | 0.7319          | 0.0386           | 0.0188           | 0.2321           |
| AP000322.53   | 0.0220      | 2.0045          | 2.3319          | 0.8053          | 0.0225           | 0.0099           | 0.2103           |
| AP4S1         | 0.0355      | 0.2182          | 2.5510          | 2.2055          | 0.4136           | 0.0054           | 0.0137           |
| ARHGAP19      | 0.0333      | 1.8112          | 2.2599          | 0.8686          | 0.0351           | 0.0119           | 0.1925           |
| B3GALNT2      | 0.0218      | 1.8549          | 2.4399          | 1.0052          | 0.0318           | 0.0073           | 0.1574           |
| BBOF1         | 0.0419      | 1.6803          | 2.2282          | 0.9271          | 0.0465           | 0.0129           | 0.1769           |
| BCAS3         | 0.0419      | 0.3928          | 2.5087          | 2.0494          | 0.3472           | 0.0061           | 0.0202           |
| BLNK          | 0.0228      | 0.0655          | 2.6833          | 2.4300          | 0.4739           | 0.0036           | 0.0075           |
| BORCS5        | 0.0031      | 2.9459          | 2.3658          | 0.2049          | 0.0016           | 0.0090           | 0.4188           |
| bP-21201H5.1  | 0.0438      | 1.8330          | 2.0959          | 0.7026          | 0.0334           | 0.0180           | 0.2411           |
| BTF3P7        | 0.0482      | 1.9571          | 1.9253          | 0.4622          | 0.0252           | 0.0271           | 0.3220           |
| C2orf82       | 0.0207      | 2.2695          | 2.1170          | 0.4294          | 0.0116           | 0.0171           | 0.3338           |
| CAPN12        | 0.0221      | 0.2619          | 2.7310          | 2.3422          | 0.3967           | 0.0032           | 0.0096           |
| CCDC183       | 0.0308      | 1.6585          | 2.3922          | 1.0930          | 0.0486           | 0.0084           | 0.1372           |
| CCDC187       | 0.0306      | 0.8548          | 2.6313          | 1.8525          | 0.1963           | 0.0043           | 0.0320           |
| CD55          | 0.0289      | 0.6765          | 2.6622          | 2.0006          | 0.2494           | 0.0039           | 0.0227           |
| CES4A         | 0.0237      | 0.6328          | 2.7363          | 2.0982          | 0.2634           | 0.0031           | 0.0179           |
| CFAP74        | 0.0221      | 1.7457          | 2.4981          | 1.1320          | 0.0404           | 0.0062           | 0.1288           |
| CH507-42P11.1 | 0.0263      | 0.4364          | 2.6886          | 2.1860          | 0.3313           | 0.0036           | 0.0144           |
| COBLL1        | 0.0381      | 0.5892          | 2.5563          | 1.9616          | 0.2779           | 0.0053           | 0.0249           |
| COMTD1        | 0.0359      | 2.2476          | 1.7730          | 0.1269          | 0.0123           | 0.0381           | 0.4495           |
| DCAF4         | 0.0226      | 2.4440          | 1.8206          | 0.0390          | 0.0073           | 0.0343           | 0.4844           |
| DCXR          | 0.0395      | 2.0949          | 1.9053          | 0.3513          | 0.0181           | 0.0284           | 0.3627           |
| DGKE          | 0.0262      | 0.8074          | 2.6939          | 1.9420          | 0.2097           | 0.0035           | 0.0261           |

|           |        |        |        |        |        |        |        |
|-----------|--------|--------|--------|--------|--------|--------|--------|
| DNA2      | 0.0380 | 1.5275 | 2.3605 | 1.1516 | 0.0633 | 0.0091 | 0.1248 |
| DTD2      | 0.0434 | 1.9858 | 1.9635 | 0.4782 | 0.0235 | 0.0248 | 0.3163 |
| ECI1      | 0.0438 | 1.8330 | 2.0959 | 0.7026 | 0.0334 | 0.0180 | 0.2411 |
| EIF3A     | 0.0300 | 2.0294 | 2.1435 | 0.6148 | 0.0212 | 0.0160 | 0.2693 |
| EML5      | 0.0419 | 0.3928 | 2.5087 | 2.0494 | 0.3472 | 0.0061 | 0.0202 |
| EPB41L4A  | 0.0376 | 0.8947 | 2.5457 | 1.7469 | 0.1855 | 0.0055 | 0.0403 |
| EYA2      | 0.0460 | 1.3966 | 2.3287 | 1.2101 | 0.0813 | 0.0099 | 0.1131 |
| FAAH2     | 0.0054 | 1.7021 | 3.0803 | 1.6981 | 0.0444 | 0.0010 | 0.0447 |
| FAM86JP   | 0.0135 | 2.0076 | 2.5616 | 1.0149 | 0.0223 | 0.0052 | 0.1551 |
| FAM95C    | 0.0485 | 1.0474 | 2.4134 | 1.5224 | 0.1474 | 0.0079 | 0.0640 |
| FKBPL     | 0.0298 | 1.4402 | 2.5087 | 1.3467 | 0.0749 | 0.0061 | 0.0890 |
| FUK       | 0.0493 | 1.9203 | 1.9477 | 0.5075 | 0.0274 | 0.0257 | 0.3059 |
| GABRA4    | 0.0475 | 2.1186 | 1.7428 | 0.1856 | 0.0171 | 0.0407 | 0.4264 |
| GDF9      | 0.0119 | 2.3786 | 2.3128 | 0.5367 | 0.0087 | 0.0104 | 0.2957 |
| GGH       | 0.0353 | 2.2040 | 1.8471 | 0.2245 | 0.0138 | 0.0324 | 0.4112 |
| GNMT      | 0.0412 | 1.9421 | 2.0376 | 0.5758 | 0.0261 | 0.0208 | 0.2824 |
| GPRC5D    | 0.0082 | 2.4664 | 2.4192 | 0.5759 | 0.0068 | 0.0078 | 0.2823 |
| GPT2      | 0.0185 | 2.0294 | 2.3975 | 0.8490 | 0.0212 | 0.0083 | 0.1979 |
| HIPK2     | 0.0467 | 1.8767 | 2.0218 | 0.6051 | 0.0303 | 0.0216 | 0.2726 |
| HIST1H2AE | 0.0030 | 2.5095 | 2.8527 | 0.9466 | 0.0060 | 0.0022 | 0.1719 |
| HIST1H3G  | 0.0434 | 1.9858 | 1.9635 | 0.4782 | 0.0235 | 0.0248 | 0.3163 |
| HIST1H4I  | 0.0192 | 0.5892 | 2.8104 | 2.1958 | 0.2779 | 0.0025 | 0.0141 |
| HLA-H     | 0.0192 | 1.3093 | 2.7310 | 1.6395 | 0.0952 | 0.0032 | 0.0506 |
| HMBS      | 0.0359 | 0.1528 | 2.5351 | 2.2348 | 0.4393 | 0.0056 | 0.0127 |
| HOXC13    | 0.0306 | 1.5493 | 2.4505 | 1.2199 | 0.0606 | 0.0071 | 0.1113 |
| HOXC8     | 0.0275 | 1.9964 | 2.2206 | 0.7081 | 0.0229 | 0.0132 | 0.2394 |
| HSD17B10  | 0.0359 | 2.2476 | 1.7730 | 0.1269 | 0.0123 | 0.0381 | 0.4495 |
| IGHEP1    | 0.0254 | 1.0520 | 2.6791 | 1.7643 | 0.1464 | 0.0037 | 0.0388 |
| IGSF8     | 0.0484 | 2.1604 | 1.6672 | 0.0878 | 0.0154 | 0.0477 | 0.4650 |
| INO80C    | 0.0467 | 1.8767 | 2.0218 | 0.6051 | 0.0303 | 0.0216 | 0.2726 |
| ISOC1     | 0.0298 | 0.9165 | 2.6357 | 1.8152 | 0.1797 | 0.0042 | 0.0347 |
| KANK1     | 0.0281 | 1.9858 | 2.2176 | 0.7124 | 0.0235 | 0.0133 | 0.2381 |
| KCNK6     | 0.0156 | 1.7239 | 2.6622 | 1.2979 | 0.0424 | 0.0039 | 0.0972 |

|               |        |        |        |        |        |        |        |
|---------------|--------|--------|--------|--------|--------|--------|--------|
| LLGL2         | 0.0189 | 2.4222 | 1.9847 | 0.2049 | 0.0077 | 0.0236 | 0.4188 |
| LMTK2         | 0.0017 | 2.8587 | 2.7680 | 0.6343 | 0.0021 | 0.0028 | 0.2629 |
| MAP2          | 0.0419 | 2.2258 | 1.6830 | 0.0586 | 0.0130 | 0.0462 | 0.4767 |
| MAP3K13       | 0.0262 | 1.0474 | 2.6675 | 1.7566 | 0.1474 | 0.0038 | 0.0395 |
| MBNL3         | 0.0319 | 1.9203 | 2.2017 | 0.7417 | 0.0274 | 0.0138 | 0.2291 |
| MED16         | 0.0095 | 2.6404 | 2.1223 | 0.1854 | 0.0041 | 0.0169 | 0.4264 |
| MINA          | 0.0281 | 0.2400 | 2.6410 | 2.2738 | 0.4051 | 0.0041 | 0.0115 |
| MOSPD1        | 0.0226 | 1.1784 | 2.6992 | 1.6981 | 0.1193 | 0.0035 | 0.0447 |
| MRPS34        | 0.0324 | 0.4801 | 2.6145 | 2.0884 | 0.3156 | 0.0045 | 0.0184 |
| MSANTD1       | 0.0438 | 1.8330 | 2.0959 | 0.7026 | 0.0334 | 0.0180 | 0.2411 |
| MTOR          | 0.0381 | 0.5892 | 2.5563 | 1.9616 | 0.2779 | 0.0053 | 0.0249 |
| NAPA          | 0.0141 | 0.9820 | 2.9056 | 2.0201 | 0.1631 | 0.0018 | 0.0217 |
| NOL3          | 0.0110 | 2.5313 | 2.1805 | 0.3123 | 0.0057 | 0.0146 | 0.3774 |
| NPAS1         | 0.0343 | 1.5930 | 2.3764 | 1.1223 | 0.0556 | 0.0087 | 0.1309 |
| NPM1P25       | 0.0301 | 0.6110 | 2.6463 | 2.0299 | 0.2706 | 0.0041 | 0.0212 |
| NR2E3         | 0.0350 | 2.0885 | 1.9917 | 0.4352 | 0.0184 | 0.0232 | 0.3317 |
| NSG1          | 0.0419 | 1.4621 | 2.3446 | 1.1808 | 0.0719 | 0.0095 | 0.1188 |
| NUDT8         | 0.0056 | 2.8368 | 2.1700 | 0.0976 | 0.0023 | 0.0150 | 0.4611 |
| OCA2          | 0.0248 | 1.6803 | 2.4822 | 1.1613 | 0.0465 | 0.0065 | 0.1228 |
| OSBP2         | 0.0066 | 1.9640 | 2.8897 | 1.3467 | 0.0248 | 0.0019 | 0.0890 |
| PIGM          | 0.0467 | 2.0731 | 1.8153 | 0.2830 | 0.0191 | 0.0347 | 0.3886 |
| PLAGL2        | 0.0459 | 0.6328 | 2.4822 | 1.8640 | 0.2634 | 0.0065 | 0.0312 |
| PMVK          | 0.0350 | 0.7201 | 2.5881 | 1.9030 | 0.2357 | 0.0048 | 0.0285 |
| POLR3B        | 0.0317 | 2.0731 | 2.0694 | 0.5172 | 0.0191 | 0.0193 | 0.3025 |
| PRDM7         | 0.0419 | 0.7638 | 2.5140 | 1.8054 | 0.2225 | 0.0060 | 0.0355 |
| PRDX2         | 0.0246 | 2.0512 | 2.2335 | 0.6831 | 0.0201 | 0.0128 | 0.2473 |
| PTGER4P2      | 0.0437 | 2.0120 | 1.9307 | 0.4303 | 0.0221 | 0.0268 | 0.3335 |
| RAB3D         | 0.0035 | 2.7932 | 2.4981 | 0.4294 | 0.0026 | 0.0062 | 0.3338 |
| RMND5B        | 0.0380 | 2.0512 | 1.9794 | 0.4489 | 0.0201 | 0.0239 | 0.3267 |
| RP11-140L24.4 | 0.0348 | 2.2414 | 1.8048 | 0.1604 | 0.0125 | 0.0355 | 0.4363 |
| RP11-30L15.4  | 0.0405 | 1.7909 | 2.1718 | 0.8009 | 0.0367 | 0.0149 | 0.2116 |
| RP11-578F21.1 | 0.0333 | 1.5006 | 2.4345 | 1.2378 | 0.0667 | 0.0075 | 0.1079 |
| RP11-723O4.6  | 0.0306 | 1.5493 | 2.4505 | 1.2199 | 0.0606 | 0.0071 | 0.1113 |

|           |        |        |        |        |        |        |        |
|-----------|--------|--------|--------|--------|--------|--------|--------|
| RPS6KB2   | 0.0266 | 1.2220 | 2.6251 | 1.6005 | 0.1108 | 0.0043 | 0.0547 |
| RPU3D3    | 0.0257 | 2.2913 | 1.9530 | 0.2635 | 0.0110 | 0.0254 | 0.3961 |
| RRH       | 0.0433 | 1.6308 | 2.2413 | 0.9724 | 0.0515 | 0.0125 | 0.1654 |
| RRP1      | 0.0226 | 2.4440 | 1.8206 | 0.0390 | 0.0073 | 0.0343 | 0.4844 |
| SCFD2     | 0.0257 | 2.2913 | 1.9530 | 0.2635 | 0.0110 | 0.0254 | 0.3961 |
| SCNN1B    | 0.0220 | 1.6366 | 2.5563 | 1.2589 | 0.0509 | 0.0053 | 0.1040 |
| SLC16A6   | 0.0444 | 1.2875 | 2.3869 | 1.3370 | 0.0990 | 0.0085 | 0.0906 |
| SLC25A23  | 0.0305 | 1.7676 | 2.3340 | 0.9661 | 0.0386 | 0.0098 | 0.1670 |
| SLC25A39  | 0.0281 | 1.9858 | 2.2176 | 0.7124 | 0.0235 | 0.0133 | 0.2381 |
| SLC25A5P1 | 0.0324 | 1.3760 | 2.4950 | 1.3772 | 0.0844 | 0.0063 | 0.0842 |
| SLC35F2   | 0.0331 | 1.0256 | 2.5775 | 1.6883 | 0.1525 | 0.0050 | 0.0457 |
| SLC39A4   | 0.0066 | 2.7277 | 2.2282 | 0.2245 | 0.0032 | 0.0129 | 0.4112 |
| SLC3A2    | 0.0494 | 0.5019 | 2.4505 | 1.9225 | 0.3079 | 0.0071 | 0.0273 |
| SLC7A1    | 0.0157 | 2.4440 | 2.0747 | 0.2733 | 0.0073 | 0.0190 | 0.3923 |
| SPAG17    | 0.0452 | 1.1129 | 2.4293 | 1.4931 | 0.1329 | 0.0076 | 0.0677 |
| SPTSSB    | 0.0419 | 2.2258 | 1.6830 | 0.0586 | 0.0130 | 0.0462 | 0.4767 |
| SYTL1     | 0.0315 | 0.8510 | 2.6198 | 1.8445 | 0.1974 | 0.0044 | 0.0326 |
| TECR      | 0.0185 | 2.0294 | 2.3975 | 0.8490 | 0.0212 | 0.0083 | 0.1979 |
| TESK2     | 0.0038 | 1.8985 | 3.1279 | 1.6102 | 0.0288 | 0.0009 | 0.0537 |
| TFAP4     | 0.0362 | 2.2913 | 1.6989 | 0.0293 | 0.0110 | 0.0447 | 0.4883 |
| TRIM26    | 0.0152 | 2.4004 | 2.1488 | 0.3708 | 0.0082 | 0.0158 | 0.3554 |
| TSR1      | 0.0281 | 1.9858 | 2.2176 | 0.7124 | 0.0235 | 0.0133 | 0.2381 |
| TSTD1     | 0.0313 | 0.5455 | 2.6304 | 2.0591 | 0.2927 | 0.0043 | 0.0197 |
| TUFM      | 0.0123 | 1.1129 | 2.9374 | 1.9616 | 0.1329 | 0.0017 | 0.0249 |
| UBR3      | 0.0419 | 0.7638 | 2.5140 | 1.8054 | 0.2225 | 0.0060 | 0.0355 |
| UPF3A     | 0.0205 | 0.4583 | 2.7786 | 2.2543 | 0.3234 | 0.0027 | 0.0121 |
| URB1      | 0.0484 | 2.1604 | 1.6672 | 0.0878 | 0.0154 | 0.0477 | 0.4650 |
| VPS36     | 0.0477 | 0.5674 | 2.4663 | 1.8932 | 0.2852 | 0.0068 | 0.0292 |
| VPS37B    | 0.0187 | 2.1822 | 2.2652 | 0.6246 | 0.0145 | 0.0117 | 0.2661 |
| VWA3A     | 0.0151 | 2.4025 | 2.1507 | 0.3712 | 0.0081 | 0.0158 | 0.3553 |
| VWA5B1    | 0.0377 | 1.9068 | 2.1210 | 0.6763 | 0.0283 | 0.0170 | 0.2494 |
| WDR88     | 0.0344 | 2.1604 | 1.9212 | 0.3220 | 0.0154 | 0.0274 | 0.3737 |
| XKRX      | 0.0237 | 1.4621 | 2.5986 | 1.4151 | 0.0719 | 0.0047 | 0.0785 |

|        |        |        |        |        |        |        |        |
|--------|--------|--------|--------|--------|--------|--------|--------|
| ZMYND8 | 0.0122 | 2.2258 | 2.4452 | 0.7612 | 0.0130 | 0.0072 | 0.2233 |
| ZNF35  | 0.0485 | 1.0474 | 2.4134 | 1.5224 | 0.1474 | 0.0079 | 0.0640 |
| ZNF786 | 0.0407 | 2.1385 | 1.8312 | 0.2537 | 0.0162 | 0.0335 | 0.3999 |
| ZSWIM1 | 0.0240 | 1.8985 | 2.3658 | 0.9076 | 0.0288 | 0.0090 | 0.1820 |
